# Supplementary material for: Crafting a High-Fidelity Mobile Application to Mitigate Death Anxiety Amidst the COVID-19 Pandemic
Source: Research Square preprint supplement (doi:10.21203/rs.3.rs-3881050/v1), 2024-01-23
Supplement: Supplementary file 1 [file e6044847c3d2d2e3a27c64de.docx]

**Appendix 1: Interview with psychologists**

1. What are your thoughts on near-death experiences and their impact on individuals?

Psychologist 1: Near-death experiences can have a profound impact on individuals, often leading to a shift in their perspectives and beliefs about life and death.

Psychologist 2: Near-death experiences are subjective and can vary greatly from person to person. It's important to approach them with an open mind and consider the individual's interpretation.

2. How can death imagery help individuals cope with their fear of death?

Psychologist 3: Death imagery can serve as a tool for individuals to confront their fears and gain a better understanding of mortality, ultimately reducing their fear of death.

Psychologist 4: Death imagery can be a way for individuals to explore and process their emotions surrounding death, helping them come to terms with their fears and anxieties.

3. What is the role of motivation in controlling or changing habits?

Psychologist 5: Motivation is crucial in controlling habits because it provides the drive and determination needed to initiate and sustain behavioral change.

Psychologist 6: Without sufficient motivation, it can be challenging to control or change habits. Motivation acts as a catalyst for individuals to take action and make meaningful changes in their behavior.

4. How can anxiety management be approached in today's society?

Psychologist 7: Anxiety management in today's society often involves a combination of therapeutic approaches such as cognitive therapy, behavioral therapy, and schema therapy. These approaches aim to help individuals identify and challenge anxious thoughts and behaviors.

Psychologist 8: Given the increasing stress and anxiety in today's society, it is important to address anxiety management through various methods, including relaxation techniques, mindfulness practices, and therapy.

5. What are the benefits of fear management?

Psychologist 9: Fear management allows individuals to differentiate between normal and abnormal fears, helping them avoid irrational or excessive fear responses that can negatively impact their daily lives.

Psychologist 10: Fear management empowers individuals to confront and overcome their fears, enabling them to live more fulfilling and meaningful lives.

6. How would you define self-confidence?

Psychologist 11: Self-confidence is the belief in one's own abilities and strengths. It is having a positive perception of oneself and the belief that one can successfully accomplish tasks or goals.

Psychologist 12: Self-confidence is an internal resource that individuals draw upon to face challenges, take risks, and persevere in the face of adversity.

7. What is the role of emotional processing in anxiety management?

Psychologist 13: Emotional processing plays a crucial role in anxiety management by helping individuals identify, understand, and effectively manage their emotional responses. It allows for the exploration and resolution of underlying emotional disturbances that contribute to anxiety.

Psychologist 14: Emotional processing allows individuals to process and integrate their emotions in a healthy way, reducing the intensity of anxiety and promoting emotional well-being.

8. How would you define spirituality?

Psychologist 15: Spirituality encompasses various aspects, including the sacred or unseen, moral values, religion, mysticism, and finding meaning in life. It is a deeply personal and subjective experience that can provide individuals with a sense of purpose and connection to something greater than themselves.

Psychologist 16: Spirituality refers to the search for meaning and purpose in life, often involving a connection to higher powers or transcendental experiences. It can be expressed through religious practices, personal beliefs, or a sense of interconnectedness with the world.

9. How can spirituality be integrated into psychological practice?

Psychologist 17: Integrating spirituality into psychological practice involves recognizing and respecting the spiritual beliefs and values of clients. It can involve incorporating spiritual practices, such as mindfulness or meditation, into therapy, or exploring how spirituality influences a client's worldview and coping mechanisms.

Psychologist 18: Integrating spirituality into psychological practice requires creating a safe and non-judgmental space for clients to explore their spiritual beliefs and experiences. It can involve helping clients find meaning and purpose in their lives, aligning their values with their actions, and supporting their spiritual growth and well-being.

10. How can individuals enhance their emotion processing skills?

Psychologist 1: Individuals can enhance their emotion processing skills through practices such as self-reflection, journaling, and therapy. Learning to identify and express emotions in a healthy way, as well as developing coping strategies, can contribute to better emotional processing.

Psychologist 2: Enhancing emotion processing skills involves developing emotional awareness, regulation, and expression. Techniques such as deep breathing, mindfulness, and seeking support from others can help individuals process and navigate their emotions effectively.

11. What are some common misconceptions about anxiety management?

Psychologist 3: One common misconception is that anxiety management means eliminating anxiety completely. In reality, anxiety is a normal human emotion, and the goal is to manage it in a way that it does not interfere with daily functioning.

Psychologist 4: Another misconception is that anxiety management is solely reliant on medication. While medication can be helpful for some individuals, there are various evidence-based therapies and self-help strategies that can effectively manage anxiety without relying solely on medication.

12. How can individuals cultivate self-confidence?

Psychologist 5: Cultivating self-confidence involves recognizing and challenging negative self-beliefs, setting and achieving realistic goals, and celebrating personal achievements. It can also involve seeking support from others, practicing self-care, and developing resilience in the face of setbacks.

Psychologist 6: Building self-confidence requires self-compassion, self-acceptance, and self-awareness. It involves identifying and building on one's strengths, setting small achievable goals, and gradually stepping out of one's comfort zone to gain new experiences and evidence of competence.

13. How can individuals incorporate spirituality into their daily lives?

Psychologist 7: Individuals can incorporate spirituality into their daily lives by engaging in practices such as prayer, meditation, or mindfulness. They can also explore their personal values and beliefs, engage in acts of kindness and compassion, and seek connection with others who share similar spiritual perspectives.

Psychologist 8: Incorporating spirituality into daily life can involve finding moments of stillness and reflection, connecting with nature, or engaging in creative expressions. It can also mean living in alignment with one's values and principles, and finding meaning and purpose in everyday activities.

14. Can spirituality be beneficial for mental health?

Psychologist 9: Yes, spirituality can be beneficial for mental health. It can provide individuals with a sense of hope, comfort, and resilience during challenging times. It can also foster a sense of community and support, and provide a framework for understanding and making sense of life experiences.

Psychologist 10: Research suggests that spirituality can have positive effects on mental health, such as reducing symptoms of anxiety and depression, improving overall well-being, and promoting a sense of meaning and purpose in life. However, it's important to note that the impact of spirituality on mental health can vary from person to person.

15. How can psychologists address the spiritual needs of their clients?

Psychologist 11: Psychologists can address the spiritual needs of their clients by creating a safe and non-judgmental space for them to explore their beliefs and values. They can ask open-ended questions, actively listen, and validate the importance of spirituality in their clients' lives. Referring clients to religious or spiritual leaders may also be appropriate if they seek more specific guidance.

Psychologist 12: Psychologists can incorporate spiritual discussions and practices into therapy when appropriate, while respecting the individual's preferences and beliefs. They can explore how spirituality intersects with the client's mental health concerns, and help them find meaning, purpose, and support in their spiritual beliefs and practices.

16. Can spirituality play a role in the treatment of anxiety disorders?

Psychologist 13: Yes, spirituality can play a role in the treatment of anxiety disorders. For some individuals, their spiritual beliefs and practices can provide a sense of comfort, hope, and guidance in managing their anxiety. Integrating spirituality into therapy can help clients explore how their spiritual beliefs can be a resource in coping with anxiety and finding inner peace.

Psychologist 14: While spirituality may not be the primary treatment for anxiety disorders, it can be a valuable adjunct to evidence-based therapies. Exploring and addressing the spiritual dimension of an individual's life can provide additional tools for managing anxiety, fostering resilience, and promoting a sense of well-being.

17. How can individuals cultivate self-confidence in social settings?

Psychologist 15: Cultivating self-confidence in social settings involves challenging negative self-beliefs, practicing self-compassion, and developing effective communication and assertiveness skills. It can also be helpful to engage in exposure exercises, gradually facing social situations that trigger anxiety, and focusing on positive self-talk and self-affirmations.

Psychologist 16: Building self-confidence in social settings often requires stepping out of one's comfort zone and practicing social skills. This can involve seeking social support, practicing active listening, and gradually increasing social interactions to build confidence and reduce social anxiety.

18. How can individuals manage their fears effectively?

Psychologist 17: Effective fear management involves understanding the root causes of fear, challenging irrational thoughts, and gradually facing feared situations through exposure therapy. Learning relaxation techniques and developing coping strategies can also be helpful in managing fears.

Psychologist 18: Individuals can manage their fears effectively by seeking support from mental health professionals, engaging in therapy, and learning techniques such as cognitive restructuring and mindfulness. It's important to identify and address the underlying factors contributing to the fears and develop personalized strategies for managing them.
